# Supplementary material for: Existential threats to the Summer Olympic and Paralympic Games? a review of emerging environmental health risks
Source: publisher site journal article supplement (doi:10.1515/reveh-2020-0141), 2021-01-22
Supplement: Supplementary file 1 [file j_reveh-2020-0141_suppl.docx]

Additional records identified through other sources (*n* = 4)

Records identified through database searching (*n* = 55)

Studies included in quantitative synthesis
(*n* = 15)

Full-text articles assessed for eligibility (*n* = 21)

Records after duplicates removed
(*n* = 48)

Records screened: *title and abstract* (*n* = 48)

**Included**

**Eligibility**

**Screening**

**Identification**

Records excluded

(*n* = 27)

- *Opinion (n = 18)*
- *Protocol (n = 5)*
- *Wrong focus (n = 4)*

*Differn*

Full-text articles excluded (*n* = 6)

- *Protocol (n = 5)*
- *Non-English (n = 1)*

Figure 1: PRISMA flowchart of article identification and selection procedures
